# Supplementary material for: Deciphering the mechanism of action of 5FDQD and the design of new neutral analogues for the FMN riboswitch: a well-tempered metadynamics simulation study
Source: Royal Society of Chemistry journal article supplement (doi:10.1039/d1cp01348c), 2021-11-29
Supplement: d1cp01348c1.pdf [file d1cp01348c1.pdf]

## Supporting Information

### Deciphering the Mechanism of action of 5FDQD and design of new neutral analogues for FMN riboswitch: A Well-tempered metadynamics simulation study

Padmaja D. Wakchaure<sup>a,b</sup>, Bishwajit Ganguly<sup>a,b,\*</sup>

<sup>a</sup>Computation and Simulation Unit (Analytical Discipline and Centralized Instrument Facility), CSIR–Central Salt and Marine Chemicals Research Institute, Bhavnagar–364002, Gujarat, India

<sup>b</sup>Academy of Scientific and Innovative Research, Ghaziabad, Uttar Pradesh- 201 002, India

\*To whom correspondence should be addressed. E-mail: [ganguly@csmcri.res.in](mailto:ganguly@csmcri.res.in) and [gang12@rediffmail.com](mailto:gang12@rediffmail.com)

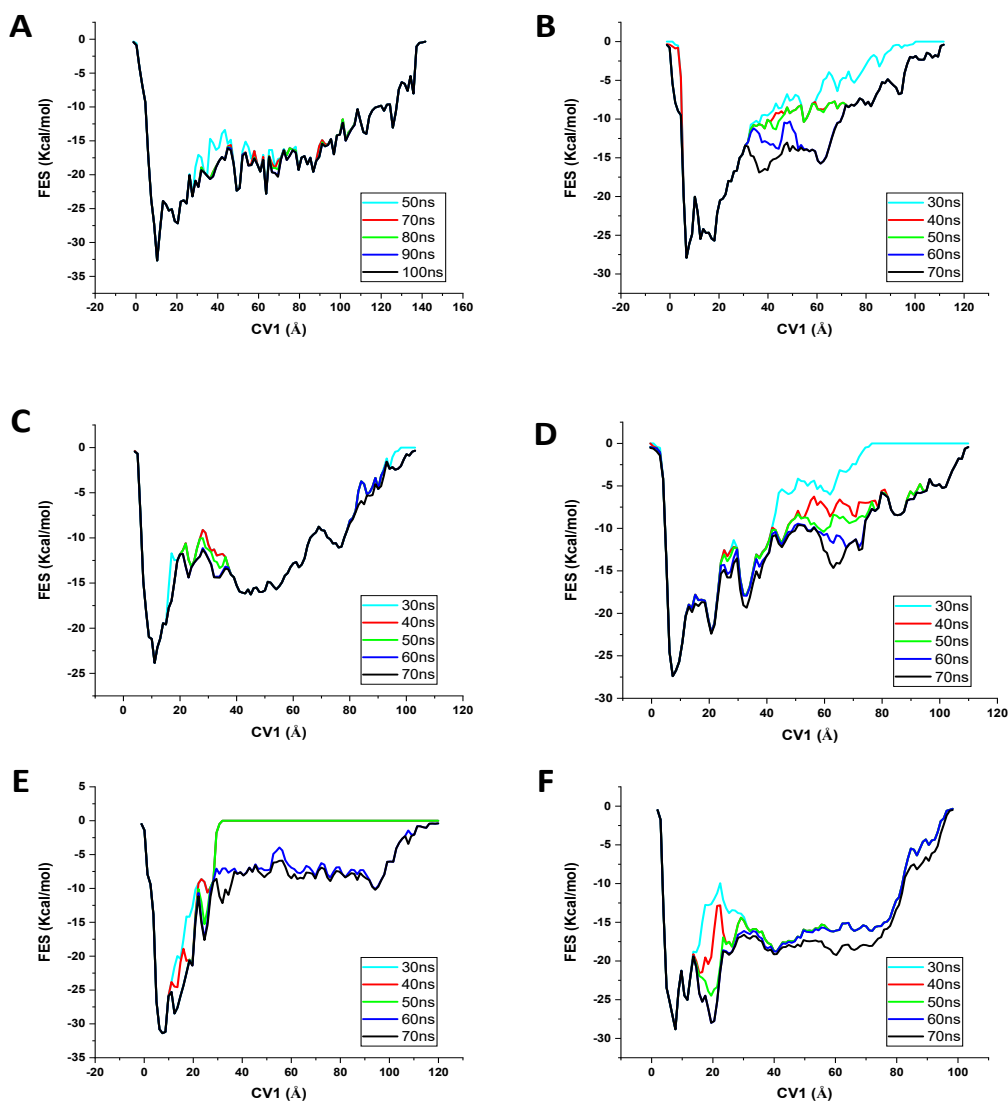

Figure S1: Convergence plot of the Free Energy landscape at different time interval for **A)** FMN-fluoro (5FDQD) **B)** FMN-benzene **C)** FMN-difluoro1 **D)** FMN-difluoro2 **E)** FMN-trifluoro **F)** FMN-amino.

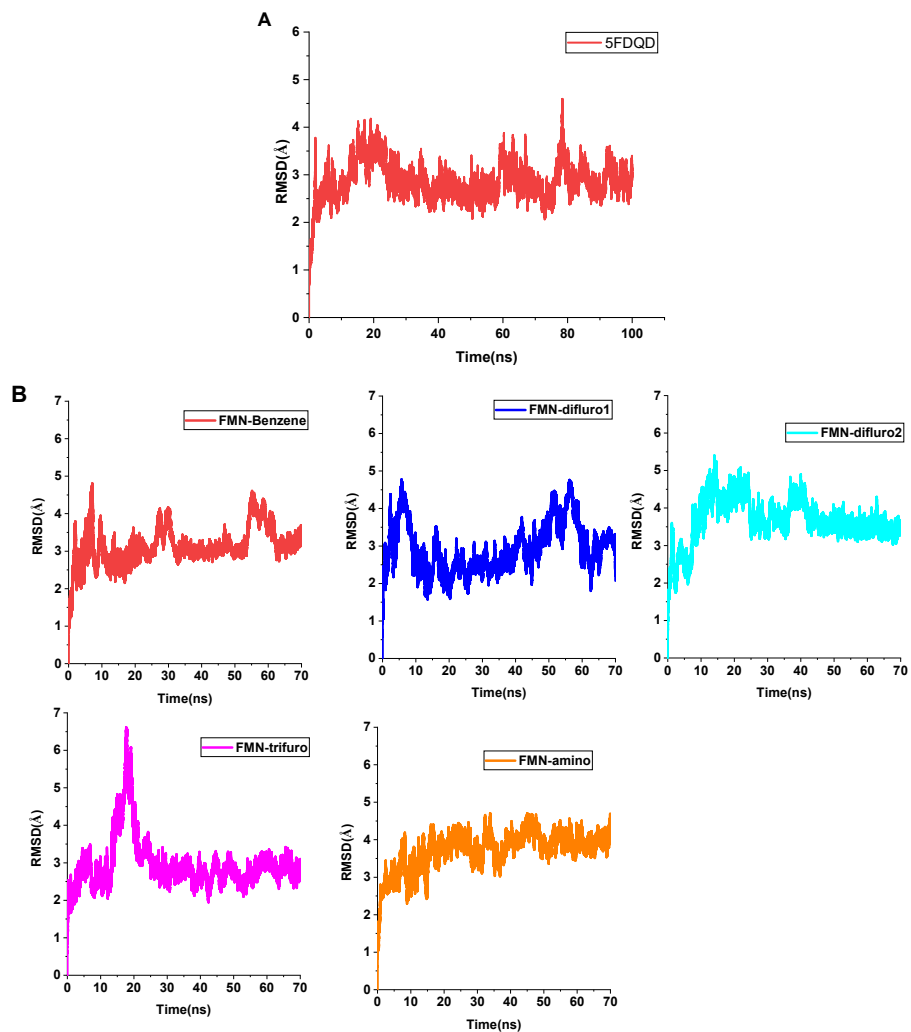

Figure S2: Root means square deviation for all ligand-bound FMN riboswitch is plotted as a function of time.

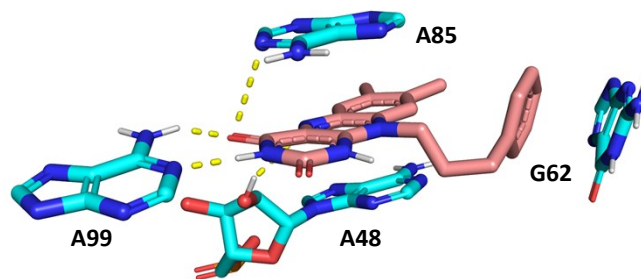

Figure S3 Binding site interaction of BRX155 with riboswitch in crystal structure.

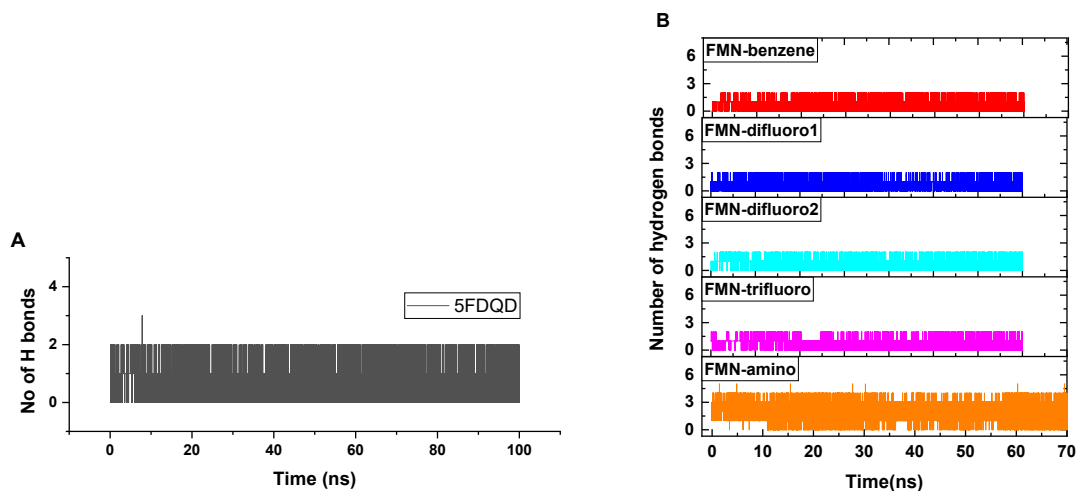

Figure S4: Number of hydrogen bonds form by ligands with the riboswitch during simulation are plotted against the time.

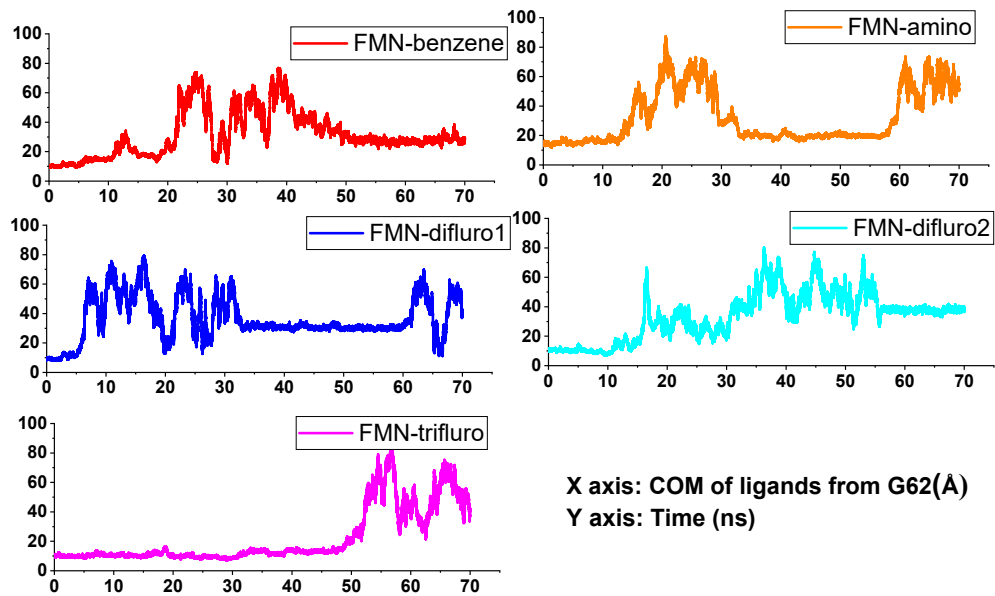

Figure S5: COM distance between the base G62 and ligand.

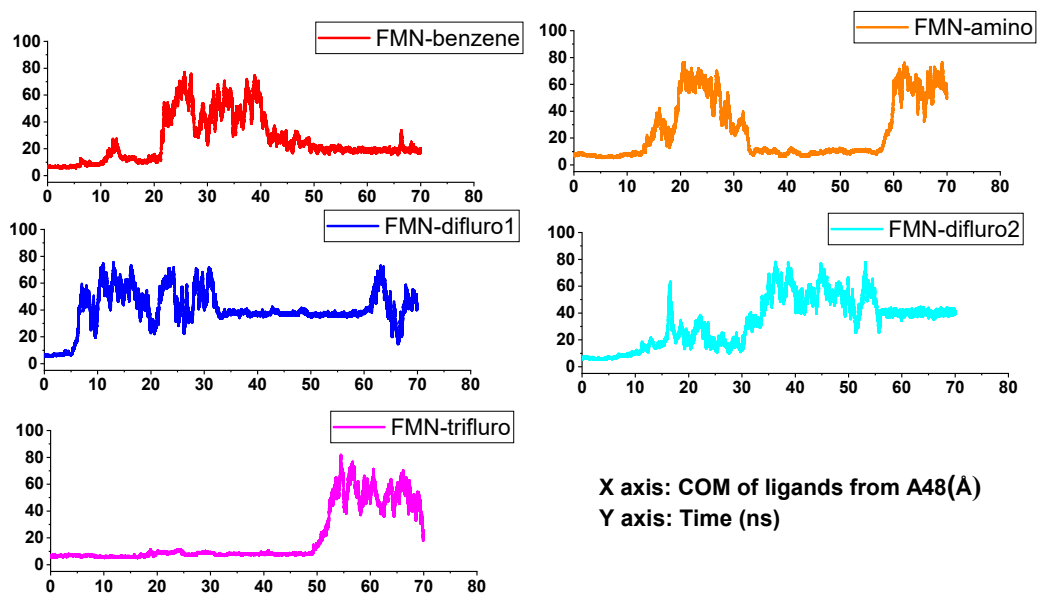

Figure S6: COM distance between the base A48 and ligand.

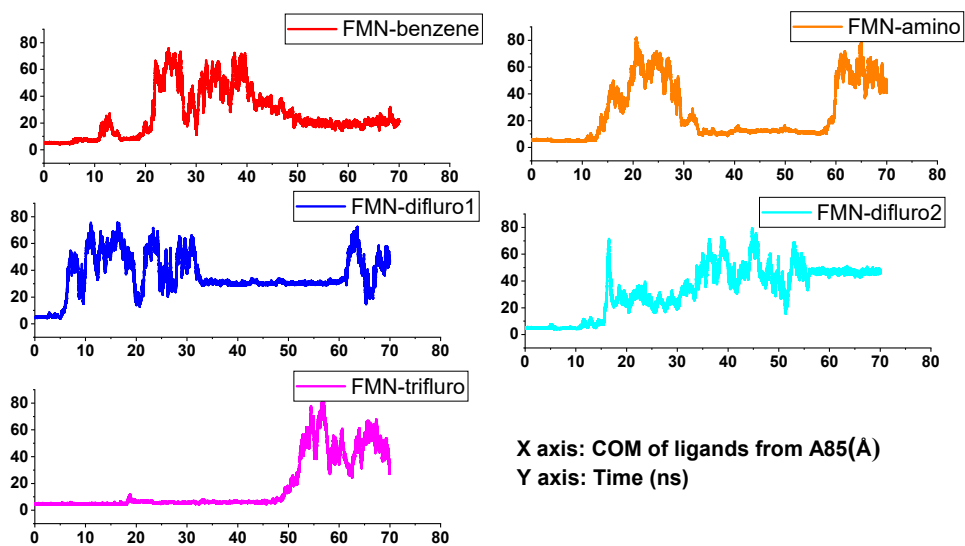

Figure S7: COM distance between the base A85 and ligand.

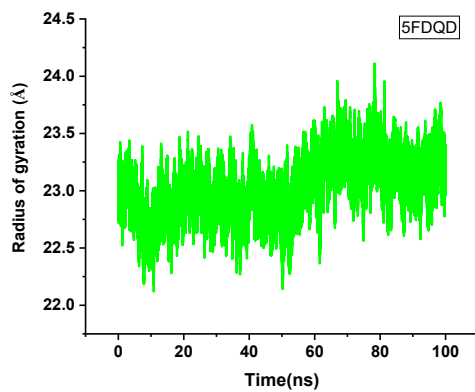

Figure S8: Radius of gyration values for riboswith bound to 5FDQD is plotted against the simulation time.

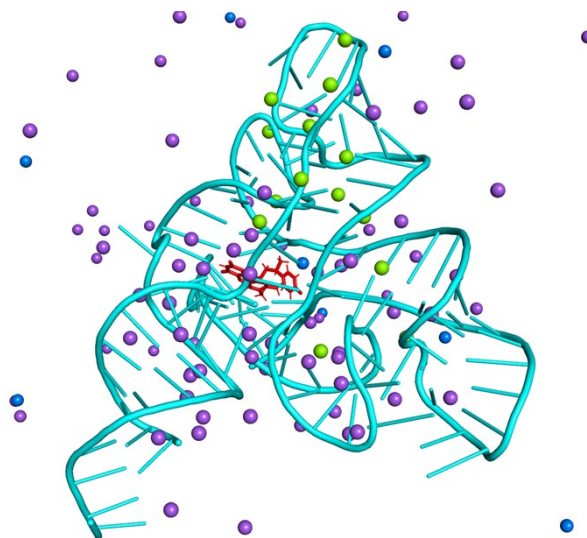

Figure S9: Interaction of metal ions with the riboswitch backbone 5FDQD.

Table S1: Ligand Charges with AM1-BCC and DFT calculations at B3LYP/6-31g(d) method.

| Ligands     | Ligand Charges with AM1-BCC | Ligand Charges with DFT calculations at B3LYP/6-31g(d) |
|-------------|-----------------------------|--------------------------------------------------------|
| FMN-benzene | C 1 -0.130000               | 1 C -0.127225                                          |
|             | C1 2 -0.127000              | 2 C -0.131362                                          |
|             | C2 3 -0.127000              | 3 C -0.134158                                          |
|             | C3 4 -0.124500              | 4 C -0.182777                                          |
|             | C4 5 -0.124500              | 5 C -0.186724                                          |
|             | C5 6 -0.089100              | 6 C -0.465034                                          |
|             | C6 7 -0.015400              | 7 C -0.205777                                          |
|             | C7 8 -0.097400              | 8 C -0.269219                                          |
|             | C8 9 -0.181000              | 9 C -0.204230                                          |
|             | C9 10 -0.100300             | 10 C -0.219883                                         |
|             | C10 11 -0.051800            | 11 C -0.532858                                         |
|             | C11 12 -0.064800            | 12 C -0.539690                                         |
|             | C12 13 -0.007300            | 13 C 0.113244                                          |
|             | C13 14 -0.110300            | 14 C 0.125639                                          |
|             | C14 15 -0.093300            | 15 C 0.161850                                          |
|             | C15 16 -0.003600            | 16 C 0.367573                                          |
|             | C16 17 0.286600             | 17 C 0.254158                                          |
|             | C17 18 0.025300             | 18 C -0.188671                                         |
|             | C18 19 0.083400             | 19 C 0.564633                                          |
|             | C19 20 0.301800             | 20 C 0.183749                                          |
|             | N 21 -0.415400              | 21 N -0.599050                                         |
|             | H 22 0.348500               | 22 H 0.350389                                          |
|             | N1 23 -0.516001             | 23 N -0.514419                                         |
|             | O 24 -0.586501              | 24 O -0.495472                                         |
|             | O1 25 -0.571501             | 25 O -0.481587                                         |

|                   |                  |                |
|-------------------|------------------|----------------|
|                   | N2 26 -0.615501  | 26 N -0.677934 |
|                   | C20 27 0.610001  | 27 C 0.617036  |
|                   | N3 28 -0.105100  | 28 N -0.614511 |
|                   | C21 29 0.850901  | 29 C 0.696288  |
|                   | H2 30 0.132000   | 30 H 0.132209  |
|                   | H3 31 0.135000   | 31 H 0.135031  |
|                   | H4 32 0.135000   | 32 H 0.131868  |
|                   | H5 33 0.136500   | 33 H 0.130660  |
|                   | H6 34 0.136500   | 34 H 0.129305  |
|                   | H7 35 0.040367   | 35 H 0.155242  |
|                   | H8 36 0.040367   | 36 H 0.144845  |
|                   | H9 37 0.040367   | 37 H 0.161619  |
|                   | H10 38 0.044700  | 38 H 0.167024  |
|                   | H11 39 0.059700  | 39 H 0.158913  |
|                   | H12 40 0.059700  | 40 H 0.176610  |
|                   | H13 41 0.150000  | 41 H 0.115950  |
|                   | H14 42 0.163000  | 42 H 0.159604  |
|                   | H15 43 0.050033  | 43 H 0.158531  |
|                   | H16 44 0.050033  | 44 H 0.176926  |
|                   | H17 45 0.050033  | 45 H 0.176586  |
|                   | H18 46 0.054700  | 46 H 0.164579  |
|                   | H19 47 0.054700  | 47 H 0.176064  |
|                   | H20 48 0.054700  | 48 H 0.177301  |
|                   | H21 49 0.081700  | 49 H 0.234359  |
|                   | H22 50 0.081700  | 50 H 0.172800  |
| 5FDQD (FMN-fluro) | C 1 -0.107000    | 1 C -0.179257  |
|                   | C1 2 -0.107000   | 2 C -0.179430  |
|                   | C2 3 -0.089100   | 3 C -0.455636  |
|                   | C3 4 -0.019400   | 4 C -0.172005  |
|                   | C4 5 -0.098400   | 5 C -0.298983  |
|                   | C5 6 -0.183000   | 6 C -0.235313  |
|                   | C6 7 -0.101300   | 7 C -0.214595  |
|                   | C7 8 -0.165500   | 8 C -0.190891  |
|                   | C8 9 -0.165500   | 9 C -0.206004  |
|                   | C9 10 -0.052800  | 10 C -0.527342 |
|                   | C10 11 -0.067800 | 11 C -0.538242 |
|                   | C11 12 -0.006300 | 12 C 0.110628  |
|                   | C12 13 -0.109300 | 13 C 0.115584  |
|                   | C13 14 -0.097300 | 14 C 0.159761  |
|                   | C14 15 -0.004600 | 15 C 0.378994  |
|                   | C15 16 0.286600  | 16 C 0.253155  |
|                   | C16 17 0.123900  | 17 C 0.376593  |
|                   | C17 18 0.026300  | 18 C -0.178473 |
|                   | C18 19 0.083400  | 19 C 0.566697  |
|                   | C19 20 0.301800  | 20 C 0.182311  |
|                   | N 21 -0.417400   | 21 N -0.600894 |
|                   | H 22 0.348500    | 22 H 0.350437  |
|                   | F 23 -0.138900   | 23 F -0.300195 |
|                   | N1 24 -0.515001  | 24 N -0.514326 |
|                   | O 25 -0.584501   | 25 O -0.496227 |
|                   | O1 26 -0.571501  | 26 O -0.481372 |
|                   | N2 27 -0.615501  | 27 N -0.678234 |

|                |                                                                                                                                                                                                                                                                                                                                                                                                                                                                                                                                                           |                                                                                                                                                                                                                                                                                                                                                                                                                                                                                                         |
|----------------|-----------------------------------------------------------------------------------------------------------------------------------------------------------------------------------------------------------------------------------------------------------------------------------------------------------------------------------------------------------------------------------------------------------------------------------------------------------------------------------------------------------------------------------------------------------|---------------------------------------------------------------------------------------------------------------------------------------------------------------------------------------------------------------------------------------------------------------------------------------------------------------------------------------------------------------------------------------------------------------------------------------------------------------------------------------------------------|
|                | C20 28 0.610001<br>N3 29 -0.106100<br>C21 30 0.848901<br>H1 31 0.055700<br>H2 32 0.055700<br>H3 33 0.055700<br>H4 34 0.050033<br>H5 35 0.050033<br>H6 36 0.050033<br>H7 37 0.157000<br>H8 38 0.163000<br>H9 39 0.080200<br>H10 40 0.080200<br>H11 41 0.062200<br>H12 42 0.062200<br>H13 43 0.061700<br>H14 44 0.042367<br>H15 45 0.042367<br>H16 46 0.042367<br>H17 47 0.141000<br>H18 48 0.150500<br>H19 49 0.150500<br>H20 50 0.141000                                                                                                                  | 28 C 0.617350<br>29 N -0.612306<br>30 C 0.696910<br>31 H 0.166563<br>32 H 0.183781<br>33 H 0.177305<br>34 H 0.160237<br>35 H 0.179215<br>36 H 0.179088<br>37 H 0.144853<br>38 H 0.157358<br>39 H 0.171138<br>40 H 0.235231<br>41 H 0.150192<br>42 H 0.159761<br>43 H 0.164624<br>44 H 0.160594<br>45 H 0.151328<br>46 H 0.157308<br>47 H 0.137528<br>48 H 0.150666<br>49 H 0.144306<br>50 H 0.120228                                                                                                    |
| FMN- difluoro1 | N 1 -0.419400<br>C 2 -0.094400<br>O 3 -0.583501<br>C1 4 -0.191000<br>N1 5 -0.516001<br>O1 6 -0.570501<br>C2 7 -0.051100<br>N2 8 -0.614501<br>C3 9 -0.100300<br>N3 10 -0.108100<br>C4 11 -0.052800<br>C5 12 -0.069800<br>C6 13 -0.191000<br>C7 14 -0.191000<br>C8 15 -0.028300<br>C9 16 -0.005300<br>C10 17 -0.110300<br>C11 18 -0.000600<br>C12 19 -0.208000<br>C13 20 0.285600<br>C14 21 0.157400<br>C15 22 0.157400<br>C16 23 0.032300<br>C17 24 0.081400<br>C18 25 0.300800<br>C19 26 0.610001<br>C20 27 0.849900<br>F 28 -0.133400<br>F1 29 -0.133400 | 1 C 0.138549<br>2 C -0.263723<br>3 C 0.402122<br>4 C 0.270258<br>5 C -0.237462<br>6 C 0.140138<br>7 C 0.203104<br>8 C 0.590697<br>9 C 0.696610<br>10 C 0.627036<br>11 H 0.177407<br>12 H 0.164263<br>13 C -0.542432<br>14 H 0.177757<br>15 H 0.177869<br>16 H 0.174471<br>17 C -0.544115<br>18 H 0.184169<br>19 H 0.184235<br>20 H 0.177065<br>21 C -0.168563<br>22 H 0.189401<br>23 H 0.206202<br>24 C -0.272968<br>25 H 0.164623<br>26 H 0.171174<br>27 C -0.358811<br>28 H 0.167154<br>29 C 0.157505 |



|               |                  |                |
|---------------|------------------|----------------|
|               | H 30 0.349500    | 30 C -0.265264 |
|               | H2 31 0.072200   | 31 C -0.254512 |
|               | H3 32 0.072200   | 32 C 0.387852  |
|               | H4 33 0.154000   | 33 H 0.162849  |
|               | H5 34 0.063200   | 34 C 0.384723  |
|               | H6 35 0.063200   | 35 H 0.163275  |
|               | H7 36 0.164000   | 36 C -0.282079 |
|               | H8 37 0.050700   | 37 N -0.557474 |
|               | H9 38 0.050700   | 38 N -0.600415 |
|               | H10 39 0.050700  | 39 N -0.630997 |
|               | H11 40 0.057367  | 40 N -0.677509 |
|               | H12 41 0.057367  | 41 H 0.362102  |
|               | H13 42 0.057367  | 42 O -0.533269 |
|               | H14 43 0.156000  | 43 O -0.553612 |
|               | H15 44 0.156000  | 44 H 0.173552  |
|               | H16 45 0.168000  | 45 H 0.176817  |
|               | H17 46 0.077700  | 46 F -0.304794 |
|               | H18 47 0.077700  | 47 F -0.304982 |
| FMN- difluro2 | N 1 -0.417400    | 1 C -0.193995  |
|               | C 2 -0.133000    | 2 C -0.247219  |
|               | O 3 -0.581501    | 3 C -0.251055  |
|               | C1 4 -0.094400   | 4 C -0.383063  |
|               | N1 5 -0.516001   | 5 C -0.290046  |
|               | O1 6 -0.569501   | 6 C -0.206211  |
|               | C2 7 -0.189000   | 7 C -0.533521  |
|               | N2 8 -0.614501   | 8 C -0.533149  |
|               | C3 9 -0.048100   | 9 C -0.265412  |
|               | N3 10 -0.108100  | 10 C 0.093053  |
|               | C4 11 -0.099300  | 11 C 0.138087  |
|               | C5 12 -0.141000  | 12 C 0.172414  |
|               | C6 13 -0.052800  | 13 C 0.347017  |
|               | C7 14 -0.066800  | 14 C 0.381802  |
|               | C8 15 -0.145000  | 15 C -0.197808 |
|               | C9 16 -0.008300  | 16 C 0.318464  |
|               | C10 17 -0.110300 | 17 C 0.330305  |
|               | C11 18 -0.068300 | 18 C 0.618454  |
|               | C12 19 0.001400  | 19 C 0.242751  |
|               | C13 20 0.285600  | 20 N -0.760589 |
|               | C14 21 0.032300  | 21 H 0.357623  |
|               | C15 22 0.091900  | 22 F -0.283355 |
|               | C16 23 0.101900  | 23 F -0.283368 |
|               | C17 24 0.081400  | 24 N -0.841282 |
|               | C18 25 0.302800  | 25 O -0.523108 |
|               | C19 26 0.610001  | 26 O -0.542420 |
|               | C20 27 0.846901  | 27 N -0.689435 |
|               | F 28 -0.122900   | 28 C 0.582172  |
|               | F1 29 -0.122900  | 29 N -0.649668 |
|               | H 30 0.349500    | 30 C 0.757767  |
|               | H2 31 0.141000   | 31 H 0.154890  |
|               | H3 32 0.071700   | 32 H 0.174655  |
|               | H4 33 0.071700   | 33 H 0.144256  |
|               | H5 34 0.152000   | 34 H 0.116080  |

|              |                                                                                                                                                                                                                                                                                                                                                                                                                                                                                                                                                                                                                                                                                                                              |                                                                                                                                                                                                                                                                                                                                                                                                                                                                                                                                                                                                                                                                              |
|--------------|------------------------------------------------------------------------------------------------------------------------------------------------------------------------------------------------------------------------------------------------------------------------------------------------------------------------------------------------------------------------------------------------------------------------------------------------------------------------------------------------------------------------------------------------------------------------------------------------------------------------------------------------------------------------------------------------------------------------------|------------------------------------------------------------------------------------------------------------------------------------------------------------------------------------------------------------------------------------------------------------------------------------------------------------------------------------------------------------------------------------------------------------------------------------------------------------------------------------------------------------------------------------------------------------------------------------------------------------------------------------------------------------------------------|
|              | H6 35 0.060200<br>H7 36 0.060200<br>H8 37 0.165000<br>H9 38 0.154000<br>H10 39 0.050367<br>H11 40 0.050367<br>H12 41 0.050367<br>H13 42 0.055033<br>H14 43 0.055033<br>H15 44 0.055033<br>H16 45 0.158000<br>H17 46 0.077700<br>H18 47 0.077700                                                                                                                                                                                                                                                                                                                                                                                                                                                                              | 35 H 0.171825<br>36 H 0.156741<br>37 H 0.118299<br>38 H 0.161726<br>39 H 0.154458<br>40 H 0.162968<br>41 H 0.163652<br>42 H 0.154420<br>43 H 0.155993<br>44 H 0.156019<br>45 H 0.154032<br>46 H 0.161515<br>47 H 0.150052                                                                                                                                                                                                                                                                                                                                                                                                                                                    |
| FMN-trifluro | C 1 -0.098100<br>C1 2 -0.012400<br>C2 3 -0.160300<br>C3 4 -0.093400<br>C4 5 -0.181000<br>C5 6 -0.100300<br>C6 7 -0.052800<br>C7 8 -0.065800<br>C8 9 -0.007300<br>C9 10 -0.110300<br>C10 11 -0.002600<br>C11 12 0.287600<br>C12 13 -0.222500<br>C13 14 -0.222500<br>C14 15 0.177900<br>C15 16 0.174400<br>C16 17 0.174400<br>C17 18 0.027300<br>C18 19 0.083400<br>C19 20 0.301800<br>N 21 -0.415400<br>H 22 0.348500<br>F 23 -0.126900<br>F1 24 -0.126900<br>F2 25 -0.124900<br>N1 26 -0.516001<br>O 27 -0.583501<br>O1 28 -0.570501<br>N2 29 -0.615501<br>C20 30 0.610001<br>N3 31 -0.106100<br>C21 32 0.848901<br>H2 33 0.049700<br>H3 34 0.049700<br>H4 35 0.049700<br>H5 36 0.071700<br>H6 37 0.062700<br>H7 38 0.062700 | 1 C -0.462322<br>2 C -0.180273<br>3 C 0.023395<br>4 C -0.267797<br>5 C -0.201317<br>6 C -0.220404<br>7 C -0.532606<br>8 C -0.537792<br>9 C 0.101339<br>10 C 0.125029<br>11 C 0.367846<br>12 C 0.255925<br>13 C -0.274652<br>14 C -0.266032<br>15 C 0.406001<br>16 C 0.350181<br>17 C 0.313375<br>18 C -0.210433<br>19 C 0.557969<br>20 C 0.185068<br>21 N -0.599930<br>22 H 0.349701<br>23 F -0.286371<br>24 F -0.289478<br>25 F -0.291422<br>26 N -0.515291<br>27 O -0.496835<br>28 O -0.482423<br>29 N -0.677014<br>30 C 0.616248<br>31 N -0.609097<br>32 C 0.694113<br>33 H 0.153218<br>34 H 0.161469<br>35 H 0.170375<br>36 H 0.161701<br>37 H 0.153199<br>38 H 0.180676 |

|           |                                                                                                                                                                                                                                                                                                                                                                                                                                                                                                                                                                                                                                                                                                                                                                      |                                                                                                                                                                                                                                                                                                                                                                                                                                                                                                                                                                                                                                                                                                                |
|-----------|----------------------------------------------------------------------------------------------------------------------------------------------------------------------------------------------------------------------------------------------------------------------------------------------------------------------------------------------------------------------------------------------------------------------------------------------------------------------------------------------------------------------------------------------------------------------------------------------------------------------------------------------------------------------------------------------------------------------------------------------------------------------|----------------------------------------------------------------------------------------------------------------------------------------------------------------------------------------------------------------------------------------------------------------------------------------------------------------------------------------------------------------------------------------------------------------------------------------------------------------------------------------------------------------------------------------------------------------------------------------------------------------------------------------------------------------------------------------------------------------|
|           | H8 39 0.149000<br>H9 40 0.163000<br>H10 41 0.050033<br>H11 42 0.050033<br>H12 43 0.050033<br>H13 44 0.055367<br>H14 45 0.055367<br>H15 46 0.055367<br>H16 47 0.172500<br>H17 48 0.172500<br>H18 49 0.080700<br>H19 50 0.080700                                                                                                                                                                                                                                                                                                                                                                                                                                                                                                                                       | 39 H 0.132973<br>40 H 0.158232<br>41 H 0.158518<br>42 H 0.175745<br>43 H 0.175797<br>44 H 0.162086<br>45 H 0.177552<br>46 H 0.167935<br>47 H 0.176185<br>48 H 0.174666<br>49 H 0.218766<br>50 H 0.196208                                                                                                                                                                                                                                                                                                                                                                                                                                                                                                       |
| FMN-amino | C 1 0.145600<br>C1 2 -0.091500<br>C2 3 -0.091500<br>C3 4 -0.088100<br>C4 5 -0.013400<br>C5 6 -0.194500<br>C6 7 -0.194500<br>C7 8 -0.097400<br>C8 9 -0.182000<br>C9 10 -0.102300<br>C10 11 -0.051800<br>C11 12 -0.066800<br>C12 13 -0.009300<br>C13 14 -0.111300<br>C14 15 -0.131300<br>C15 16 -0.004600<br>C16 17 0.286600<br>H 18 0.393300<br>H3 19 0.393300<br>C17 20 0.024300<br>C18 21 0.083400<br>C19 22 0.301800<br>N 23 -0.416400<br>H24 24 0.348500<br>N1 25 -0.517001<br>O 26 -0.584501<br>O1 27 -0.572501<br>N2 28 -0.615501<br>C20 29 0.610001<br>N3 30 -0.823201<br>N4 31 -0.104100<br>C21 32 0.852899<br>H4 33 0.133000<br>H5 34 0.133000<br>H6 35 0.040367<br>H7 36 0.040367<br>H8 37 0.040367<br>H9 38 0.057700<br>H10 39 0.133000<br>H11 40 0.133000 | 1 C 0.301211<br>2 C -0.195125<br>3 C -0.191849<br>4 C -0.464261<br>5 C -0.178405<br>6 C -0.169173<br>7 C -0.180998<br>8 C -0.251989<br>9 C -0.251327<br>10 C -0.220518<br>11 C -0.533275<br>12 C -0.534185<br>13 C 0.120501<br>14 C 0.127456<br>15 C 0.150459<br>16 C 0.384872<br>17 C 0.256378<br>18 H 0.316639<br>19 H 0.319519<br>20 C -0.183418<br>21 C 0.557898<br>22 C 0.184087<br>23 N -0.597563<br>24 H 0.350263<br>25 N -0.515260<br>26 O -0.496671<br>27 O -0.482364<br>28 N -0.676821<br>29 C 0.616223<br>30 N -0.788078<br>31 N -0.608562<br>32 C 0.693401<br>33 H 0.128509<br>34 H 0.124424<br>35 H 0.152288<br>36 H 0.146169<br>37 H 0.158603<br>38 H 0.169605<br>39 H 0.121487<br>40 H 0.113871 |

|     |    |          |    |   |          |
|-----|----|----------|----|---|----------|
| H12 | 41 | 0.059200 | 41 | H | 0.158573 |
| H13 | 42 | 0.059200 | 42 | H | 0.141446 |
| H14 | 43 | 0.161000 | 43 | H | 0.150744 |
| H15 | 44 | 0.162000 | 44 | H | 0.159568 |
| H16 | 45 | 0.048700 | 45 | H | 0.158220 |
| H17 | 46 | 0.048700 | 46 | H | 0.176431 |
| H18 | 47 | 0.048700 | 47 | H | 0.176559 |
| H19 | 48 | 0.054367 | 48 | H | 0.163356 |
| H20 | 49 | 0.054367 | 49 | H | 0.175468 |
| H21 | 50 | 0.054367 | 50 | H | 0.176706 |
| H22 | 51 | 0.081200 | 51 | H | 0.170493 |
| H23 | 52 | 0.081200 | 52 | H | 0.218416 |

Table S2: Hydrogen bond energy ( $\Delta E$ ) calculated at the DFT level of theory B3LYP/6-31g(d) in water solvent.

| Ligand        | $\Delta E(\text{kcal/mol})$ |
|---------------|-----------------------------|
| FMN-benzene   | -11.5                       |
| FMN-fluoro    | -8.5                        |
| FMN-difluoro1 | -3.1                        |
| FMN-difluoro2 | -8.4                        |
| FMN-trifluoro | -12.0                       |
| FMN-amino     | -10.1                       |

Table S3. Dihedral angle C1, C2, C3, C4 at Basin I in all neutral the ligands

| Ligands       | C1,C2,C3,C4 dihedral angle(degrees) |
|---------------|-------------------------------------|
| FMN-benzene   | 50.0°                               |
| FMN-fluoro    | 73.6°                               |
| FMN-difluoro1 | 175.2°                              |
| FMN-difluoro2 | 60.3°                               |
| FMN-trifluoro | 76.3°                               |
| FMN-amino     | 85.5°                               |

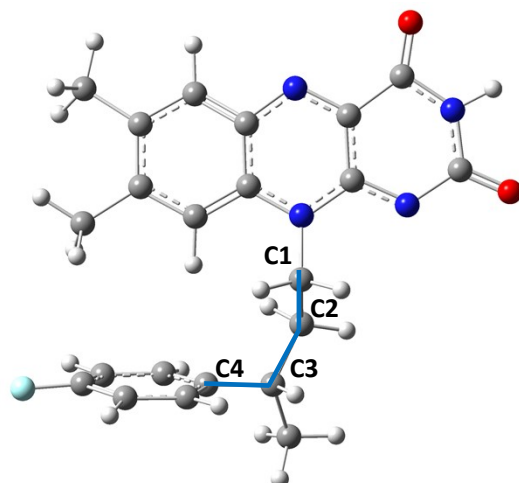

Table S4: Electrostatic energy between ligands and the metal ions in the system, calculated with MMPBSA approach.

| Ligands       | Electrostatic energy (kcal/mol) |
|---------------|---------------------------------|
| FMN-benzene   | -2.94± 8.15                     |
| FMN-fluoro    | 0.69±6.2                        |
| FMN-difluoro1 | -1.51±7.4                       |
| FMN-difluoro2 | -1.98±10.5                      |
| FMN-trifluoro | -0.21±10.1                      |
| FMN-amino     | -1.02±6.7                       |

Table S5: Van der Waals and Electrostatic energy contributions in the ligand binding free energy with riboswitch calculated with the MMPBSA approach.

| Ligands       | Van der Waals energy (kcal/mol) | Electrostatic energy (kcal/mol) |
|---------------|---------------------------------|---------------------------------|
| FMN-benzene   | -13.84±22.3                     | -0.53±8.9                       |
| FMN-fluoro    | -3.09±11.8                      | -1.23±6.4                       |
| FMN-difluoro1 | -4.57±15.0                      | -0.72±7.7                       |
| FMN-difluoro2 | -16.12±20.5                     | -3.97±17.5                      |
| FMN-trifluoro | -40.13±24.5                     | -8.40±13.6                      |
| FMN-amino     | -11.80±21.2                     | -4.36±11.0                      |

### Computational Methodology:

#### Alchemical free energy (AFE) calculations with free energy perturbation (FEP):

The alchemical free energy simulation was performed in Gromacs 4.6 package with Amber99sb\_ParmBSC0 force field. The ligand-riboswitch complex along with the water box

were used same as the Wt-MTD details given in main text. A time step of 2 fs was used in all MD runs. To make the configuration suitable for simulation, we have first minimized its energy with steepest descent minimizer. The electrostatic and van der Waals interactions were calculated using the particle mesh Ewald (PME) method. Minimized system then used for the global equilibration with turning on pressure and temperature coupling. Temperature coupling using velocity rescaling with a stochastic term with time constant  $\tau_t$  set to 0.2. Pressure coupling with berendsen method with the compressibility set to  $4.5 \times 10^{-5} \text{ bar}^{-1}$  and time constant  $\tau_p$  5. The rlist, rvdw and rcoulomb were set to 1. In free energy perturbation methods, we force the system by coupling the interaction strength between a molecule of interest and the rest of the system to a variable  $\lambda$ . The final simulation couples the ligand from  $\lambda=0$  where it doesn't interact with the system, to the situation at  $\lambda=1$ , where the riboswitch is bound to the ligand. After the equilibration we split the system into different fep-lambda points 0.0, 0.1, 0.2, 0.3, 0.4, 0.5, 0.6, 0.7, 0.8, 0.9, 0.99, 0.999, 0.9999, 1. Gromacs uses 'soft-core' interactions to make sure that while the normal (Lennard-Jones and Coulomb) interactions are being turned off. The sc-power, sc-sigma and sc-alpha were set to 1, 0.3, 1 respectively. For each window 500000 production steps after 100000 equilibration steps was performed. The simulation was carried out for both ligands 5FDQD and FMN-Difluro2 in both aqueous solution and the binding site. The free energy change was calculated by using of the Bennett acceptance ratio (BAR)<sup>1</sup> method.

Table S6. Free energy values obtained with the alchemical free energy calculations.

| States                  | 5FDQD ( $\Delta G$ kJ/mol) | FMN-Difluro2 ( $\Delta G$ kJ/mol) |
|-------------------------|----------------------------|-----------------------------------|
| 0-1                     | -51.86 $\pm$ 0.71          | -42.49 $\pm$ 1.21                 |
| 1-2                     | -48.54 $\pm$ 0.32          | -44.87 $\pm$ 0.74                 |
| 2-3                     | -37.19 $\pm$ 0.37          | -32.17 $\pm$ 0.69                 |
| 3-4                     | -18.37 $\pm$ 0.62          | -14.29 $\pm$ 0.86                 |
| 4-5                     | 6.71 $\pm$ 0.73            | 6.32 $\pm$ 1.10                   |
| 5-6                     | 35.28 $\pm$ 2.57           | 30.70 $\pm$ 2.40                  |
| 6-7                     | 7.01 $\pm$ 5.20            | 5.82 $\pm$ 1.50                   |
| 7-8                     | -6.47 $\pm$ 1.83           | -10.74 $\pm$ 0.44                 |
| 8-9                     | -13.36 $\pm$ 1.40          | -17.49 $\pm$ 0.73                 |
| 9-10                    | -34.40 $\pm$ 0.85          | -37.99 $\pm$ 0.73                 |
| 10-11                   | -10.65 $\pm$ 0.18          | -9.32 $\pm$ 0.15                  |
| 11-12                   | -1.26 $\pm$ 0.02           | -1.14 $\pm$ 0.02                  |
| 12-13                   | -0.12 $\pm$ 0.00           | -0.13 $\pm$ 0.00                  |
| Final $\Delta G$ kJ/mol | -173.21 $\pm$ 11.54        | -167.80 $\pm$ 2.24                |

|                           |        |        |
|---------------------------|--------|--------|
| Final $\Delta G$ kcal/mol | -41.40 | -40.10 |
|---------------------------|--------|--------|

- 1 C. H. Bennett, Efficient estimation of free energy differences from Monte Carlo data, *J. Comput. Phys.*, 1976, **22**, 245–268.
